# Supplementary material for: Dried Blood Spot (DBS) Methodology Study for Biomarker Discovery in Lysosomal Storage Disease (LSD)
Source: MDPI journal article supplement (doi:10.3390/metabo11060382), 2021-06-13
Supplement: s1 [file s1]

**Supplementary Table S1.** Lysosomal storage diseases (LSDs) used in the study

(\*) other LSDs (lysosomal storage diseases included in the study except neuronal ceroid lipofuscinoses)

| <b>Gene</b>  | <b>Disorder</b>                                       | <b>OMIM</b> | <b>Enzyme deficiency / Protein defective</b>         |
|--------------|-------------------------------------------------------|-------------|------------------------------------------------------|
| <i>GLA</i>   | Fabry                                                 | 301500      | $\alpha$ -galactosidase                              |
| <i>GBA</i>   | Gaucher                                               | 230800      | $\beta$ -glucocerebrosidase                          |
| <i>GALC</i>  | Krabbe                                                | 245200      | Galactocerebrosidase                                 |
| <i>ARSA</i>  | Metachromatic leukodystrophy                          | 25010       | Arylsulfatase A                                      |
| <i>GLB1</i>  | GM1 gangliosidosis                                    | 230500      | $\beta$ -galactosidase                               |
| <i>IDUA</i>  | Mucopolysaccharidosis type I (Hurler syndrome)        | 607015      | $\alpha$ -L-iduronidase                              |
| <i>IDS</i>   | Mucopolysaccharidosis type II (Hunter syndrome)       | 300900      | Iduronate -2-sulfatase                               |
| <i>SGSH</i>  | Mucopolysaccharidosis type IIIA (Sanfilippo syndrome) | 252900      | Heparan-N-sulfatase                                  |
| <i>GALNS</i> | Mucopolysaccharidosis type IVA (Morquio syndrome)     | 253000      | Galactose 6-sulfatase                                |
| <i>ARSB</i>  | Mucopolysaccharidosis type VI (Maroteaux-Lamy)        | 253200      | N-acetyl galactosamine 4-sulfatase (Arylsulfatase B) |
| <i>SMN1</i>  | Spinal muscular atrophy                               | 253300      | survival Motor Neuron (SMN)                          |
| <i>ASAHI</i> | Farber                                                | 228000      | Acid ceramidase                                      |
| <i>TTR</i>   | Transthyretin -related amyloidosis                    | 105210      | Transthyretin (Prealbumin)                           |
| <i>FAH</i>   | Tyrosinemia type I                                    | 276700      | Fumarylacetoacetate hydrolase                        |
| <i>LIPA</i>  | Wolman                                                | 270800      | Acid lipase                                          |
| <i>DMD</i>   | Duchenne muscular dystrophy                           | 310200      | Dystrophin                                           |
| <i>CFTR</i>  | Cystic fibrosis                                       | 219700      | Fibrosis transmembrane conductance regulator         |
| <i>GAA</i>   | Glycogen storage disease II                           | 232300      | Acid alpha-1,4-glucosidase                           |

\*\*NCL (Neuronal ceroid lipofuscinoses)

| <b>Gene</b>    | <b>Disease</b> | <b>OMIM</b> | <b>Encoded protein</b>                                                                |
|----------------|----------------|-------------|---------------------------------------------------------------------------------------|
| <i>PPT1</i>    | CLN – type 1   | 256730      | Palmitoyl protein thioesterase 1, PPT1 soluble protein                                |
| <i>TPP1</i>    | CLN– type 2    | 204500      | Tripeptidyl peptidase 1, TPP1 soluble protein                                         |
| <i>CLN3</i>    | CLN– type 3    | 204200      | CLN3 transmembrane protein                                                            |
| <i>CLN5</i>    | CLN– type 5    | 256731      | CLN5 soluble protein                                                                  |
| <i>CLN6</i>    | CLN– type 6    | 601780      | CLN6 transmembrane protein                                                            |
| <i>MFSD8</i>   | CLN– type 7    | 610951      | CLN7/MFSD8 transmembrane protein                                                      |
| <i>CLN8</i>    | CLN– type 8    | 610003      | CLN8 transmembrane protein                                                            |
| <i>ATP13A2</i> | CLN– type 12   | 606693      | CLN12/ATPase13A2 transmembrane protein                                                |
| <i>KCTD7</i>   | CLN– type 14   | 611726      | CLN14 / Potassium channel tetramerization domain containing protein 7 soluble protein |

**Supplementary Table S2.** List of the total number of patients and controls  
(a)

| Group                                    | ID | Sex | Age |
|------------------------------------------|----|-----|-----|
| Non -LSD affected individuals (controls) | 1  | F   | 33  |
|                                          | 2  | F   | 35  |
|                                          | 3  | F   | 39  |
|                                          | 4  | F   | 30  |
|                                          | 5  | F   | 65  |
|                                          | 6  | F   | 23  |
|                                          | 7  | F   | 31  |
|                                          | 8  | F   | 33  |
|                                          | 9  | F   | 45  |
|                                          | 10 | F   | 32  |
|                                          | 11 | F   | 28  |
|                                          | 12 | F   | 65  |
|                                          | 13 | F   | 23  |
|                                          | 14 | F   | 32  |
|                                          | 15 | M   | 30  |
|                                          | 16 | M   | 31  |
|                                          | 17 | M   | 28  |
|                                          | 18 | M   | 41  |
|                                          | 19 | M   | 41  |
|                                          | 20 | M   | 35  |
|                                          | 21 | M   | 33  |
|                                          | 22 | M   | 30  |
|                                          | 23 | M   | 37  |
|                                          | 24 | M   | 41  |
|                                          | 25 | M   | 36  |
|                                          | 26 | M   | 28  |
|                                          | 27 | M   | 25  |

(b)

| Group                                     | ID | Gene           | Sex | Age |
|-------------------------------------------|----|----------------|-----|-----|
| Neuronal ceroid lipofuscinoses (NCL -LSD) | 1  | <i>ATP13A2</i> | F   | 32  |
|                                           | 2  | <i>CLN3</i>    | M   | 8   |
|                                           | 3  | <i>CLN5</i>    | M   | 6   |
|                                           | 4  | <i>CLN6</i>    | F   | 5   |
|                                           | 5  | <i>CLN6</i>    | F   | 5   |

|  |    |              |   |    |
|--|----|--------------|---|----|
|  | 6  | <i>CLN6</i>  | F | 6  |
|  | 7  | <i>CLN6</i>  | F | 6  |
|  | 8  | <i>CLN6</i>  | F | 7  |
|  | 9  | <i>CLN6</i>  | F | 9  |
|  | 10 | <i>CLN6</i>  | F | 45 |
|  | 11 | <i>CLN6</i>  | F | 11 |
|  | 12 | <i>CLN6</i>  | F | 8  |
|  | 13 | <i>CLN6</i>  | F | 7  |
|  | 14 | <i>CLN6</i>  | F | 5  |
|  | 15 | <i>CLN6</i>  | M | 4  |
|  | 16 | <i>CLN6</i>  | M | 5  |
|  | 17 | <i>CLN6</i>  | M | 6  |
|  | 18 | <i>CLN6</i>  | M | 8  |
|  | 19 | <i>CLN6</i>  | M | ?  |
|  | 20 | <i>CLN8</i>  | M | 8  |
|  | 21 | <i>KCTD7</i> | M | 3  |
|  | 22 | <i>KCTD7</i> | M | 12 |
|  | 23 | <i>MFSD8</i> | F | 5  |
|  | 24 | <i>PPT1</i>  | F | 5  |
|  | 25 | <i>TPP1</i>  | M | 5  |
|  | 26 | <i>TPP1</i>  | M | 13 |

(c)

| Group                                   | ID | Gene | Sex | Age |
|-----------------------------------------|----|------|-----|-----|
| Lysosomal Storage Diseases (other LSDs) | 1  | ARSB | M   | 6   |
|                                         | 2  | ASAH | F   | 1   |
|                                         | 3  | CFTR | F   | 0,2 |
|                                         | 4  | CFTR | F   | 2   |
|                                         | 5  | CFTR | M   | 4   |
|                                         | 6  | DMD  | M   | 6   |
|                                         | 7  | FAH  | F   | 24  |
|                                         | 8  | GAA  | F   | 20  |
|                                         | 9  | GAA  | F   | 22  |
|                                         | 10 | GAA  | F   | 25  |
|                                         | 11 | GALC | F   | 3   |
|                                         | 12 | GALC | M   | 4   |
|                                         | 13 | GLA  | M   | 10  |

|  |    |      |   |     |
|--|----|------|---|-----|
|  | 14 | IDS  | M | NA  |
|  | 15 | LIPA | F | 0,3 |
|  | 16 | TTR  | M | 65  |
